# Supplementary material
Source: publisher site journal article supplement (https://static.cambridge.org/content/id/urn:cambridge.org:id:article:S144396462000011X/resource/name/S144396462000011Xsupp001.docx)
Supplement: Supplementary file 1 [file S144396462000011Xsupp001.docx]

**Supplementary material**

**SurveyMonkey Survey: Current Australian speech-language pathology practice in addressing the needs of children after parental acquired communication disability**

1. I have read and understand the above information and the information outlined in the Participant Information Sheet:
   - Yes
   - No
2. I consent to taking part in this research project:
   - Yes
   - No

Section One: Demographic information

1. Your sex:
   - Male
   - Female
2. Your age:

|  |
| --- |

1. Number of years working as a speech pathologist:
   - <1 year
   - 1-2 years
   - 3-5 years
   - 6-10 years
   - 11-15 years
   - 16-20 years
   - 20+ years
2. Number of years experience as a speech pathologist working with communication disability:
   - <1 year
   - 1-2 years
   - 3-5 years
   - 6-10 years
   - 11-15 years
   - 16-20 years
   - 20+ years
3. Your highest level of qualification:
   - Bachelors
   - Bachelors (with Honours)
   - Postgraduate masters
   - MPhil
   - PhD
4. Current region of practice in Australia:
   - Australian Capital Territory
   - New South Wales
   - Queensland
   - Victoria
   - South Australia
   - Northern Territory
   - Western Australia
   - Tasmania
5. Current work setting:
   - Regional
   - Rural/remote
   - Metropolitan
6. Predominant clinical setting (please indicate percentage of time spent in each area):

| Acute |  |
| --- | --- |
| Inpatient rehabilitation |  |
| Outpatient rehabilitation |  |
| Community |  |
| Aged-care |  |
| University |  |
| Other |  |

1. Dominant caseload (please indicate percentage of time spent on each presentation):

| Dysphagia |  |
| --- | --- |
| Aphasia |  |
| Dysarthria |  |
| Apraxia of Speech |  |
| Cognitive communication impairment |  |
| Voice |  |
| Other |  |

1. In the last 12 months, what proportion of your clients with communication disability have had children under the age of 18 living in the same household?

|  |
| --- |

1. Following on from Question 10, in the past 12 months how many of your clients with communication disability have had children in the following age brackets that you have provided services to?

| 0-3 years of age |  |
| --- | --- |
| 4-6 years of age |  |
| 7-12 years of age |  |
| 13-17 years of age |  |

1. Please indicate which areas you would have addressed more often with the children of your clients with acquired communication disabilities, if you had the capacity within your service to do so:
   - Provision of information and education
   - Provision of counselling and/or support
   - Other (please specify)
2. In your opinion, is there a need to improve the services that are provided to children of people with communication disabilities?
   - Yes
   - No
   - Unsure
   - Please explain your response:

|  |
| --- |

Section Two: Providing information and education

1. Describe your current practice in providing information and education to children of people with communication disability:

|  |
| --- |

1. What is your knowledge of providing information and education to children of people with communication disability?
   - Very limited
   - Limited
   - Adequate
   - Good
   - Very good
2. How confident are you in providing information and education to children of people with communication disability?
   - Very unconfident
   - Unconfident
   - Neutral
   - Confident
   - Very confident
3. How often do you provide information and education to children of people with communication disability?
   - Never
   - Rarely
   - Occasionally
   - Frequently
   - Very frequently
4. How often do you use the medical terminology (e.g. aphasia) to refer to the communication disability when providing information and education to children of people with communication disability?
   - Never
   - Rarely
   - Occasionally
   - Frequently
   - Very frequently
5. How often do you describe the causes of the communication disability (e.g. stroke) when providing information and education to children of people with communication disability?
   - Never
   - Rarely
   - Occasionally
   - Frequently
   - Very frequently
6. How often do you discuss the recovery of the communication disability when providing information and education to children of people with communication disability?
   - Never
   - Rarely
   - Occasionally
   - Frequently
   - Very frequently
7. What are the barriers to providing information and education to children of people with communication disability? (Please list as many as you can think of in order of the most challenging to the least challenging barrier.)

|  |
| --- |

1. What currently enables (facilitates) you to provide information and education to children of people with communication disability? (Please list as many as you can think of in order of the most enabling to the least enabling facilitator.)

|  |
| --- |

1. What potential enablers/facilitators would improve your ability to provide information and education to children of people with communication disability?

|  |
| --- |

1. The following statements relate to your role in providing information and education to children of people with communication disability. Please consider each statement and rate your level of agreement to that statement from strongly agree to strongly disagree (if the statement is not relevant to you or your workplace please select N/A).

|  | Strongly agree | Agree | Neutral | Disagree | Strongly disagree | N/A |
| --- | --- | --- | --- | --- | --- | --- |
| I have sufficient knowledge of how to provide information and education to children of people with communication disability |  |  |  |  |  |  |
| I have sufficient knowledge about why providing information and education to children of people with communication disability is important |  |  |  |  |  |  |
| I have sufficient experience providing information and education to children of people with communication disability |  |  |  |  |  |  |
| I have adequate time to provide information and education to children of people with communication disability |  |  |  |  |  |  |
| I have enough resources for providing information and education to children of people with communication disability |  |  |  |  |  |  |
| There are other speech pathologists also providing information and education to children within my workplace of people with communication disability |  |  |  |  |  |  |
| I feel that there is a need for speech pathologists to provide information and education to children of people with communication disability |  |  |  |  |  |  |
| I make plans to provide information and education to children of people with communication disability |  |  |  |  |  |  |
| I make a habit of providing information and education to children of people with communication disability |  |  |  |  |  |  |
| I feel confident providing information and education to children of people with communication disability |  |  |  |  |  |  |

Section Three: Providing support and/or counselling

1. Describe your current practice in providing support and/or counselling to children of people with communication disability:

|  |
| --- |

1. What is your knowledge of providing support and/or counselling to children of people with communication disability?
   - Very limited
   - Limited
   - Adequate
   - Good
   - Very good
2. How confident are you in providing support and/or counselling to children of people with communication disability?
   - Very unconfident
   - Unconfident
   - Neutral
   - Confident
   - Very confident
3. How often do you provide support and/or counselling to children of people with communication disability?
   - Never
   - Rarely
   - Occasionally
   - Frequently
   - Very frequently
4. What are the barriers to providing support and/or counselling to children of people with communication disability? (Please list as many as you can think of in order of the most challenging to the least challenging barrier.)

|  |
| --- |

1. What currently enables (facilitates) you to provide information and education to children of people with communication disability? (Please list as many as you can think of in order of the most enabling to the least enabling facilitator.)

|  |
| --- |

1. What potential enablers/facilitators would improve your ability to provide information and education to children of people with communication disability?

|  |
| --- |

1. The following statements relate to your role in providing support and/or counselling to children of people with communication disability. Please consider each statement and rate your level of agreement to that statement from strongly agree to strongly disagree (if the statement is not relevant to you or your workplace please select N/A).

|  | Strongly agree | Agree | Neutral | Disagree | Strongly disagree | N/A |
| --- | --- | --- | --- | --- | --- | --- |
| I have sufficient knowledge of how to provide support and/or counselling to children of people with communication disability |  |  |  |  |  |  |
| I have sufficient knowledge about why providing support and/or counselling to children of people with communication disability is important |  |  |  |  |  |  |
| I have sufficient experience providing support and/or counselling to children of people with communication disability |  |  |  |  |  |  |
| I have adequate time to provide support and/or counselling to children of people with communication disability |  |  |  |  |  |  |
| I have enough resources for providing support and/or counselling to children of people with communication disability |  |  |  |  |  |  |
| There are other speech pathologists also providing support and/or counselling to children within my workplace of people with communication disability |  |  |  |  |  |  |
| I feel that there is a need for speech pathologists to provide support and/or counselling to children of people with communication disability |  |  |  |  |  |  |
| I make plans to provide support and/or counselling to children of people with communication disability |  |  |  |  |  |  |
| I make a habit of providing support and/or counselling to children of people with communication disability |  |  |  |  |  |  |
| I feel confident providing support and/or counselling to children of people with communication disability |  |  |  |  |  |  |

1. Overall, what is the most significant challenge in working with children of people with acquired communication disabilities?

|  |
| --- |
